# Supplementary material for: Investigating the dispersal of antibiotic resistance associated genes from manure application to soil and drainage waters in simulated agricultural farmland systems
Source: PLoS One. 2019 Sep 17;14(9):e0222470. doi: 10.1371/journal.pone.0222470 (PMC6748443; doi:10.1371/journal.pone.0222470)
Supplement: S2 Table — (XLSX) [file pone.0222470.s003.xlsx]

## Sheet: Sheet1
CARD ARG Class	Gene	CARD ARG Mechanism	Classification of Origin
Aminocoumarin	mdtA	antibiotic efflux	Soil
Aminocoumarin	mdtB	antibiotic efflux	Water_Enriched
Aminocoumarin	mdtC	antibiotic efflux	Water_Enriched
Aminocoumarin	novA	antibiotic efflux	Manure_Enriched
Aminocoumarin	Streptomyces	mutation conferring antibiotic resistance	Water_Enriched
Aminoglycoside	AAC(2')-Ib	acylation of antibiotic conferring resistance	Water_Enriched
Aminoglycoside	AAC(2')-Ie	acylation of antibiotic conferring resistance	Water_Enriched
Aminoglycoside	AAC(3)-Ib	acylation of antibiotic conferring resistance	Manure_Persister
Aminoglycoside	AAC(3)-IV	acylation of antibiotic conferring resistance	Manure_Persister
Aminoglycoside	AAC(6')-Iae	acylation of antibiotic conferring resistance	Background
Aminoglycoside	AAC(6')-Iak	acylation of antibiotic conferring resistance	Background
Aminoglycoside	AAC(6')-Ib'	acylation of antibiotic conferring resistance	Manure_Enriched
Aminoglycoside	AAC(6')-Ib7	acylation of antibiotic conferring resistance	Manure_Enriched
Aminoglycoside	AAC(6')-Ie-APH(2'')-Ia	phosphorylation of antibiotic conferring resistance	Manure_Persister
Aminoglycoside	AAC(6')-IIa	acylation of antibiotic conferring resistance	Manure_Persister
Aminoglycoside	AAC(6')-Iid	acylation of antibiotic conferring resistance	Manure_Persister
Aminoglycoside	AAC(6')-Ip	acylation of antibiotic conferring resistance	Manure_Persister
Aminoglycoside	aad(6)	nucleotidylation of antibiotic conferring resistance	Manure_Persister
Aminoglycoside	aadA	nucleotidylation of antibiotic conferring resistance	Manure_Persister
Aminoglycoside	aadA11	nucleotidylation of antibiotic conferring resistance	Manure_Enriched
Aminoglycoside	aadA11	nucleotidylation of antibiotic conferring resistance	Manure_Persister
Aminoglycoside	aadA13	nucleotidylation of antibiotic conferring resistance	Manure_Persister
Aminoglycoside	aadA14	nucleotidylation of antibiotic conferring resistance	Manure_Persister
Aminoglycoside	aadA15	nucleotidylation of antibiotic conferring resistance	Manure_Persister
Aminoglycoside	aadA16	nucleotidylation of antibiotic conferring resistance	Water_Enriched
Aminoglycoside	aadA22	nucleotidylation of antibiotic conferring resistance	Manure_Persister
Aminoglycoside	aadA24	nucleotidylation of antibiotic conferring resistance	Manure_Enriched
Aminoglycoside	aadA25	nucleotidylation of antibiotic conferring resistance	Manure_Persister
Aminoglycoside	aadA3	nucleotidylation of antibiotic conferring resistance	Manure_Persister
Aminoglycoside	aadA5	nucleotidylation of antibiotic conferring resistance	Manure_Persister
Aminoglycoside	aadA6	nucleotidylation of antibiotic conferring resistance	Water_Enriched
Aminoglycoside	aadA7	nucleotidylation of antibiotic conferring resistance	Background
Aminoglycoside	aadA8	nucleotidylation of antibiotic conferring resistance	Manure_Enriched
Aminoglycoside	aadA9	nucleotidylation of antibiotic conferring resistance	Manure_Enriched
Aminoglycoside	acrD	antibiotic efflux	Water_Enriched
Aminoglycoside	amrA	antibiotic efflux	Water_Enriched
Aminoglycoside	amrB	antibiotic efflux	Water_Enriched
Aminoglycoside	ANT(4')-Ib	nucleotidylation of antibiotic conferring resistance	Manure_Enriched
Aminoglycoside	ANT(6)-Ia	nucleotidylation of antibiotic conferring resistance	Manure_Persister
Aminoglycoside	ANT(6)-Ib	nucleotidylation of antibiotic conferring resistance	Manure_Persister
Aminoglycoside	ANT(9)-Ia	nucleotidylation of antibiotic conferring resistance	Manure_Persister
Aminoglycoside	APH(2'')-If	phosphorylation of antibiotic conferring resistance	Manure_Persister
Aminoglycoside	APH(2'')-IIa	phosphorylation of antibiotic conferring resistance	Manure_Persister
Aminoglycoside	APH(2'')-IIIa	phosphorylation of antibiotic conferring resistance	Manure_Persister
Aminoglycoside	APH(3'')-Ib	phosphorylation of antibiotic conferring resistance	Manure_Enriched
Aminoglycoside	APH(3')-Ia	phosphorylation of antibiotic conferring resistance	Manure_Enriched
Aminoglycoside	APH(3')-IIa	phosphorylation of antibiotic conferring resistance	Manure_Persister
Aminoglycoside	APH(3')-IIIa	phosphorylation of antibiotic conferring resistance	Manure_Enriched
Aminoglycoside	APH(3')-VI	phosphorylation of antibiotic conferring resistance	Manure_Persister
Aminoglycoside	APH(3')-VIa	phosphorylation of antibiotic conferring resistance	Manure_Persister
Aminoglycoside	APH(4)-Ia	phosphorylation of antibiotic conferring resistance	Manure_Persister
Aminoglycoside	APH(6)-Ia	phosphorylation of antibiotic conferring resistance	Soil
Aminoglycoside	APH(6)-Ib	phosphorylation of antibiotic conferring resistance	Background
Aminoglycoside	APH(6)-Ic	phosphorylation of antibiotic conferring resistance	Manure_Enriched
Aminoglycoside	APH(6)-Id	phosphorylation of antibiotic conferring resistance	Manure_Enriched
Aminoglycoside	cpxA	antibiotic efflux	Soil
Aminoglycoside	npmA	Unclassified	Manure_Persister
Aminoglycoside	Pseudomonas	antibiotic efflux	Water_Enriched
Aminoglycoside	rmtF	Unclassified	Manure_Persister
Aminoglycoside	spd	nucleotidylation of antibiotic conferring resistance	Background
Antibacterial Free Fatty Acids	farA	antibiotic efflux	Water_Enriched
Beta-Lactam	ACI-1	hydrolysis of beta-lactam antibiotic by serine beta-lactamase	Manure_Persister
Beta-Lactam	AIM-1	hydrolysis of beta-lactam antibiotic by metallo-beta-lactamase	Background
Beta-Lactam	AQU-1	hydrolysis of beta-lactam antibiotic by serine beta-lactamase	Water_Enriched
Beta-Lactam	BcI	hydrolysis of beta-lactam antibiotic by metallo-beta-lactamase	Background
Beta-Lactam	BcII	hydrolysis of beta-lactam antibiotic by metallo-beta-lactamase	Background
Beta-Lactam	BJP-1	hydrolysis of beta-lactam antibiotic by metallo-beta-lactamase	Water_Enriched
Beta-Lactam	Bla2	hydrolysis of beta-lactam antibiotic by metallo-beta-lactamase	Background
Beta-Lactam	BlaB	hydrolysis of beta-lactam antibiotic by metallo-beta-lactamase	Water_Enriched
Beta-Lactam	blaF	hydrolysis of beta-lactam antibiotic by serine beta-lactamase	Background
Beta-Lactam	Burkholderia	Unclassified	Water_Enriched
Beta-Lactam	BUT-1	hydrolysis of beta-lactam antibiotic by serine beta-lactamase	Background
Beta-Lactam	CARB-1	hydrolysis of beta-lactam antibiotic by serine beta-lactamase	Background
Beta-Lactam	CARB-4	hydrolysis of beta-lactam antibiotic by serine beta-lactamase	Background
Beta-Lactam	CARB-8	hydrolysis of beta-lactam antibiotic by serine beta-lactamase	Background
Beta-Lactam	CfxA3	hydrolysis of beta-lactam antibiotic by serine beta-lactamase	Manure_Persister
Beta-Lactam	CfxA6	hydrolysis of beta-lactam antibiotic by serine beta-lactamase	Manure_Persister
Beta-Lactam	CTX-M-63	hydrolysis of beta-lactam antibiotic by serine beta-lactamase	Water_Enriched
Beta-Lactam	CTX-M-75	hydrolysis of beta-lactam antibiotic by serine beta-lactamase	Background
Beta-Lactam	EXO	hydrolysis of beta-lactam antibiotic by serine beta-lactamase	Background
Beta-Lactam	FEZ-1	hydrolysis of beta-lactam antibiotic by metallo-beta-lactamase	Background
Beta-Lactam	GES-23	hydrolysis of beta-lactam antibiotic by serine beta-lactamase	Water_Enriched
Beta-Lactam	JOHN-1	hydrolysis of beta-lactam antibiotic by metallo-beta-lactamase	Background
Beta-Lactam	L1	hydrolysis of beta-lactam antibiotic by metallo-beta-lactamase	Background
Beta-Lactam	LRA-1	hydrolysis of beta-lactam antibiotic by serine beta-lactamase	Water_Enriched
Beta-Lactam	LRA-13	hydrolysis of beta-lactam antibiotic by serine beta-lactamase	Water_Enriched
Beta-Lactam	LRA-19	hydrolysis of beta-lactam antibiotic by metallo-beta-lactamase	Background
Beta-Lactam	LRA-3	hydrolysis of beta-lactam antibiotic by metallo-beta-lactamase	Manure_Enriched
Beta-Lactam	LRA-8	hydrolysis of beta-lactam antibiotic by metallo-beta-lactamase	Soil
Beta-Lactam	LRA-9	hydrolysis of beta-lactam antibiotic by metallo-beta-lactamase	Soil
Beta-Lactam	MOX-9	hydrolysis of beta-lactam antibiotic by serine beta-lactamase	Background
Beta-Lactam	OCH-2	hydrolysis of beta-lactam antibiotic by serine beta-lactamase	Background
Beta-Lactam	OCH-6	hydrolysis of beta-lactam antibiotic by serine beta-lactamase	Water_Enriched
Beta-Lactam	OCH-7	hydrolysis of beta-lactam antibiotic by serine beta-lactamase	Background
Beta-Lactam	OKP-B-20	hydrolysis of beta-lactam antibiotic by serine beta-lactamase	Background
Beta-Lactam	OXA-114a	hydrolysis of beta-lactam antibiotic by serine beta-lactamase	Background
Beta-Lactam	OXA-209	hydrolysis of beta-lactam antibiotic by serine beta-lactamase	Manure_Persister
Beta-Lactam	OXA-22	hydrolysis of beta-lactam antibiotic by serine beta-lactamase	Water_Enriched
Beta-Lactam	OXA-258	hydrolysis of beta-lactam antibiotic by serine beta-lactamase	Water_Enriched
Beta-Lactam	OXA-29	hydrolysis of beta-lactam antibiotic by serine beta-lactamase	Background
Beta-Lactam	OXA-347	hydrolysis of beta-lactam antibiotic by serine beta-lactamase	Manure_Enriched
Beta-Lactam	OXA-368	hydrolysis of beta-lactam antibiotic by serine beta-lactamase	Water_Enriched
Beta-Lactam	OXA-415	hydrolysis of beta-lactam antibiotic by serine beta-lactamase	Background
Beta-Lactam	OXA-60	hydrolysis of beta-lactam antibiotic by serine beta-lactamase	Water_Enriched
Beta-Lactam	OXA-74	hydrolysis of beta-lactam antibiotic by serine beta-lactamase	Background
Beta-Lactam	PDC-75	hydrolysis of beta-lactam antibiotic by serine beta-lactamase	Background
Beta-Lactam	Rm3	hydrolysis of beta-lactam antibiotic by metallo-beta-lactamase	Water_Enriched
Beta-Lactam	SPG-1	hydrolysis of beta-lactam antibiotic by metallo-beta-lactamase	Water_Enriched
Beta-Lactam	TEM-220	hydrolysis of beta-lactam antibiotic by serine beta-lactamase	Manure_Persister
Diaminopyrimidine	dfrA1	antibiotic target replacement	Manure_Persister
Diaminopyrimidine	dfrA20	antibiotic target replacement	Manure_Enriched
Diaminopyrimidine	dfrA21	antibiotic target replacement	Water_Enriched
Diaminopyrimidine	dfrB3	antibiotic target replacement	Water_Enriched
Diaminopyrimidine	dfrD	antibiotic target replacement	Manure_Persister
Diaminopyrimidine	dfrG	antibiotic target replacement	Background
Elfamycin	facT	antibiotic efflux	Manure_Enriched
Fluoroquinolone	lrfA	antibiotic efflux	Water_Enriched
Fluoroquinolone	mdtK	antibiotic efflux	Background
Fluoroquinolone	patA	antibiotic efflux	Water_Enriched
Fluoroquinolone	qacH	antibiotic efflux	Manure_Persister
Fluoroquinolone	QnrB12	Unclassified	Background
Fluoroquinolone	tolC	antibiotic efflux	Background
Glycopeptide	vanHO	restructuring of bacterial cell wall conferring antibiotic resistance	Background
Glycopeptide	vanJ	restructuring of bacterial cell wall conferring antibiotic resistance	Soil
Glycopeptide	vanO	restructuring of bacterial cell wall conferring antibiotic resistance	Background
Glycopeptide	vanRG	restructuring of bacterial cell wall conferring antibiotic resistance	Background
Glycopeptide	vanRI	restructuring of bacterial cell wall conferring antibiotic resistance	Soil
Glycopeptide	vanRM	restructuring of bacterial cell wall conferring antibiotic resistance	Background
Glycopeptide	vanRO	restructuring of bacterial cell wall conferring antibiotic resistance	Manure_Enriched
Glycopeptide	vanSA	restructuring of bacterial cell wall conferring antibiotic resistance	Background
Glycopeptide	vanSF	restructuring of bacterial cell wall conferring antibiotic resistance	Background
Glycopeptide	vanSM	restructuring of bacterial cell wall conferring antibiotic resistance	Background
Glycopeptide	vanSO	restructuring of bacterial cell wall conferring antibiotic resistance	Manure_Enriched
Glycopeptide	vanTG	restructuring of bacterial cell wall conferring antibiotic resistance	Manure_Persister
Glycopeptide	vanXO	restructuring of bacterial cell wall conferring antibiotic resistance	Soil
Glycopeptide	vanXYG	restructuring of bacterial cell wall conferring antibiotic resistance	Background
Lincosamide	linG	nucleotidylation of antibiotic conferring resistance	Manure_Persister
Lincosamide	lnuA	nucleotidylation of antibiotic conferring resistance	Manure_Persister
Lincosamide	lnuB	nucleotidylation of antibiotic conferring resistance	Manure_Enriched
Lincosamide	lnuC	nucleotidylation of antibiotic conferring resistance	Manure_Persister
Lincosamide	lnuD	nucleotidylation of antibiotic conferring resistance	Manure_Persister
Lincosamide	lnuF	nucleotidylation of antibiotic conferring resistance	Manure_Persister
Lincosamide	lnuG	nucleotidylation of antibiotic conferring resistance	Manure_Persister
Macrolide	Bacillus	phosphorylation of antibiotic conferring resistance	Background
Macrolide	carA	antibiotic target protection	Water_Enriched
Macrolide	EreB	hydrolysis of macrolide macrocycle lactone ring	Background
Macrolide	macB	antibiotic efflux	Water_Enriched
Macrolide	mefA	antibiotic efflux	Manure_Enriched
Macrolide	mefB	antibiotic efflux	Manure_Persister
Macrolide	mefC	antibiotic efflux	Background
Macrolide	mgtA	glycosylation of antibiotic conferring resistance	Background
Macrolide	mphB	phosphorylation of antibiotic conferring resistance	Manure_Persister
Macrolide	mphD	phosphorylation of antibiotic conferring resistance	Manure_Persister
Macrolide	mphG	phosphorylation of antibiotic conferring resistance	Background
Macrolide	oleB	antibiotic target protection	Water_Enriched
Macrolide	oleC	antibiotic efflux	Water_Enriched
Macrolide	oleD	glycosylation of antibiotic conferring resistance	Background
Macrolide	srmB	antibiotic target protection	Water_Enriched
Macrolide	tlrC	antibiotic target protection	Water_Enriched
Multiple Resistance	acrB	antibiotic efflux	Water_Enriched
Multiple Resistance	acrF	antibiotic efflux	Manure_Enriched
Multiple Resistance	adeF	antibiotic efflux	Water_Enriched
Multiple Resistance	adeI	antibiotic efflux	Background
Multiple Resistance	adeJ	antibiotic efflux	Background
Multiple Resistance	AxyX	antibiotic efflux	Water_Enriched
Multiple Resistance	AxyY	antibiotic efflux	Water_Enriched
Multiple Resistance	ceoA	antibiotic efflux	Water_Enriched
Multiple Resistance	ceoB	antibiotic efflux	Water_Enriched
Multiple Resistance	clbA	Unclassified	Manure_Persister
Multiple Resistance	CRP	antibiotic efflux	Manure_Persister
Multiple Resistance	efpA	antibiotic efflux	Water_Enriched
Multiple Resistance	efrA	antibiotic efflux	Background
Multiple Resistance	Enterobacter	antibiotic efflux	Water_Enriched
Multiple Resistance	Erm(33)	Unclassified	Manure_Persister
Multiple Resistance	Erm(35)	Unclassified	Manure_Enriched
Multiple Resistance	Erm(36)	Unclassified	Manure_Persister
Multiple Resistance	Erm(42)	Unclassified	Manure_Persister
Multiple Resistance	Erm(47)	Unclassified	Manure_Persister
Multiple Resistance	ErmA	Unclassified	Manure_Persister
Multiple Resistance	ErmB	Unclassified	Manure_Enriched
Multiple Resistance	ErmC	Unclassified	Manure_Enriched
Multiple Resistance	ErmF	Unclassified	Manure_Enriched
Multiple Resistance	ErmG	Unclassified	Manure_Enriched
Multiple Resistance	ErmQ	Unclassified	Manure_Enriched
Multiple Resistance	ErmT	Unclassified	Manure_Persister
Multiple Resistance	ErmX	Unclassified	Manure_Enriched
Multiple Resistance	ErmY	Unclassified	Manure_Persister
Multiple Resistance	gadX	antibiotic efflux	Background
Multiple Resistance	lsaB	antibiotic target protection	Background
Multiple Resistance	lsaC	antibiotic target protection	Manure_Persister
Multiple Resistance	lsaE	antibiotic target protection	Manure_Enriched
Multiple Resistance	mdsB	antibiotic efflux	Manure_Enriched
Multiple Resistance	mdsC	antibiotic efflux	Water_Enriched
Multiple Resistance	mdtF	antibiotic efflux	Water_Enriched
Multiple Resistance	mdtN	antibiotic efflux	Background
Multiple Resistance	mdtO	antibiotic efflux	Background
Multiple Resistance	mel	antibiotic target protection	Manure_Enriched
Multiple Resistance	MexA	antibiotic efflux	Water_Enriched
Multiple Resistance	MexB	antibiotic efflux	Water_Enriched
Multiple Resistance	MexC	antibiotic efflux	Water_Enriched
Multiple Resistance	MexD	antibiotic efflux	Water_Enriched
Multiple Resistance	MexE	antibiotic efflux	Water_Enriched
Multiple Resistance	MexF	antibiotic efflux	Water_Enriched
Multiple Resistance	mexI	antibiotic efflux	Water_Enriched
Multiple Resistance	mexQ	antibiotic efflux	Water_Enriched
Multiple Resistance	mexV	antibiotic efflux	Background
Multiple Resistance	mexW	antibiotic efflux	Water_Enriched
Multiple Resistance	mexX	antibiotic efflux	Water_Enriched
Multiple Resistance	mexY	antibiotic efflux	Water_Enriched
Multiple Resistance	msrA	antibiotic target protection	Background
Multiple Resistance	msrE	antibiotic target protection	Manure_Persister
Multiple Resistance	mtrA	antibiotic efflux	Manure_Enriched
Multiple Resistance	mtrD	antibiotic efflux	Manure_Enriched
Multiple Resistance	MuxA	antibiotic efflux	Water_Enriched
Multiple Resistance	MuxB	antibiotic efflux	Water_Enriched
Multiple Resistance	MuxC	antibiotic efflux	Water_Enriched
Multiple Resistance	opcM	antibiotic efflux	Water_Enriched
Multiple Resistance	OpmB	antibiotic efflux	Water_Enriched
Multiple Resistance	opmE	antibiotic efflux	Water_Enriched
Multiple Resistance	oprA	antibiotic efflux	Water_Enriched
Multiple Resistance	OprM	antibiotic efflux	Water_Enriched
Multiple Resistance	OprN	antibiotic efflux	Water_Enriched
Multiple Resistance	OprZ	antibiotic efflux	Water_Enriched
Multiple Resistance	oqxB	antibiotic efflux	Water_Enriched
Multiple Resistance	smeA	antibiotic efflux	Background
Multiple Resistance	smeB	antibiotic efflux	Water_Enriched
Multiple Resistance	smeC	antibiotic efflux	Water_Enriched
Multiple Resistance	smeD	antibiotic efflux	Water_Enriched
Multiple Resistance	smeE	antibiotic efflux	Water_Enriched
Multiple Resistance	smeF	antibiotic efflux	Soil
Multiple Resistance	smeR	antibiotic efflux	Manure_Enriched
Multiple Resistance	smeS	antibiotic efflux	Soil
Multiple Resistance	vgaALC	antibiotic target protection	Soil
Multiple Resistance	vgaE	antibiotic target protection	Manure_Persister
Nucleoside	SAT-1	acylation of antibiotic conferring resistance	Manure_Enriched
Nucleoside	SAT-3	acylation of antibiotic conferring resistance	Background
Nucleoside	SAT-4	acylation of antibiotic conferring resistance	Water_Enriched
Oxazolidinone	optrA	Unclassified	Manure_Persister
Peptide	arnA	Unclassified	Water_Enriched
Peptide	Brucella	Unclassified	Background
Peptide	pmrE	Unclassified	Manure_Persister
Phenicol	cat	acylation of antibiotic conferring resistance	Water_Enriched
Phenicol	cat-TC	acylation of antibiotic conferring resistance	Manure_Enriched
Phenicol	catB3	acylation of antibiotic conferring resistance	Manure_Persister
Phenicol	catB6	acylation of antibiotic conferring resistance	Background
Phenicol	catB8	acylation of antibiotic conferring resistance	Background
Phenicol	catQ	acylation of antibiotic conferring resistance	Manure_Persister
Phenicol	cfrC	Unclassified	Manure_Persister
Phenicol	cml	antibiotic efflux	Water_Enriched
Phenicol	cmlv	phosphorylation of antibiotic conferring resistance	Soil
Phenicol	cmx	antibiotic efflux	Manure_Persister
Phenicol	floR	antibiotic efflux	Manure_Enriched
Phenicol	mexM	antibiotic efflux	Water_Enriched
Phenicol	mexN	antibiotic efflux	Water_Enriched
Phenicol	plasmid-encoded	acylation of antibiotic conferring resistance	Background
Pleuromutilin	TaeA	antibiotic efflux	Manure_Enriched
Rifamycin	arr-1	ADP-ribosylation of antibiotic conferring resistance	Background
Rifamycin	iri	hydroxylation of antibiotic conferring resistance	Water_Enriched
Rifamycin	Nocardia	antibiotic target replacement	Water_Enriched
Rifamycin	RbpA	antibiotic target protection	Manure_Enriched
Rifamycin	rgt1438	glycosylation of antibiotic conferring resistance	Water_Enriched
Rifamycin	rphA	phosphorylation of antibiotic conferring resistance	Manure_Enriched
Rifamycin	rphB	phosphorylation of antibiotic conferring resistance	Manure_Persister
Streptogramin	vatE	acylation of antibiotic conferring resistance	Manure_Persister
Streptogramin	vatH	acylation of antibiotic conferring resistance	Background
Streptogramin	vgaB	antibiotic target protection	Manure_Enriched
Sulfonamide	sul1	antibiotic target replacement	Manure_Enriched
Sulfonamide	sul2	antibiotic target replacement	Manure_Enriched
Tetracycline	adeB	antibiotic efflux	Water_Enriched
Tetracycline	otr(A)	antibiotic target protection	Water_Enriched
Tetracycline	otr(B)	antibiotic efflux	Background
Tetracycline	otrC	antibiotic efflux	Soil
Tetracycline	tap	antibiotic efflux	Manure_Enriched
Tetracycline	tcr3	antibiotic efflux	Manure_Enriched
Tetracycline	tet(31)	antibiotic efflux	Manure_Enriched
Tetracycline	tet(33)	antibiotic efflux	Manure_Persister
Tetracycline	tet(39)	antibiotic efflux	Manure_Persister
Tetracycline	tet(40)	antibiotic efflux	Manure_Persister
Tetracycline	tet(41)	antibiotic efflux	Water_Enriched
Tetracycline	tet(42)	antibiotic efflux	Water_Enriched
Tetracycline	tet(43)	antibiotic efflux	Water_Enriched
Tetracycline	tet(45)	antibiotic efflux	Background
Tetracycline	tet(A)	antibiotic efflux	Manure_Persister
Tetracycline	tet(C)	antibiotic efflux	Background
Tetracycline	tet(D)	antibiotic efflux	Manure_Persister
Tetracycline	tet(G)	antibiotic efflux	Manure_Enriched
Tetracycline	tet(H)	antibiotic efflux	Manure_Enriched
Tetracycline	tet(J)	antibiotic efflux	Water_Enriched
Tetracycline	tet(L)	antibiotic efflux	Manure_Enriched
Tetracycline	tet(V)	antibiotic efflux	Water_Enriched
Tetracycline	tet(W/N/W)	antibiotic target protection	Manure_Persister
Tetracycline	tet(Y)	antibiotic efflux	Manure_Enriched
Tetracycline	tet(Z)	antibiotic efflux	Manure_Enriched
Tetracycline	tet32	antibiotic target protection	Manure_Persister
Tetracycline	tet36	antibiotic target protection	Manure_Enriched
Tetracycline	tet44	antibiotic target protection	Manure_Enriched
Tetracycline	tetA(48)	antibiotic efflux	Soil
Tetracycline	tetA(P)	antibiotic efflux	Manure_Enriched
Tetracycline	tetB(P)	antibiotic target protection	Manure_Persister
Tetracycline	tetM	antibiotic target protection	Manure_Enriched
Tetracycline	tetO	antibiotic target protection	Manure_Enriched
Tetracycline	tetQ	antibiotic target protection	Manure_Enriched
Tetracycline	tetS	antibiotic target protection	Manure_Persister
Tetracycline	tetT	antibiotic target protection	Water_Enriched
Tetracycline	tetW	antibiotic target protection	Manure_Enriched
Tetracycline	tetX	hydroxylation of antibiotic conferring resistance	Manure_Enriched
Unclassified	bcr-1	antibiotic efflux	Water_Enriched
Unclassified	Bifidobacteria	mutation conferring antibiotic resistance	Manure_Enriched
Unclassified	FosB	hydrolysis of fosfomycin epoxide ring	Background
Unclassified	fusH	hydrolysis of fusidic acid to inactive lactone derivative	Water_Enriched
Unclassified	mdtG	antibiotic efflux	Background
Unclassified	mexK	antibiotic efflux	Water_Enriched
Unclassified	mexL	antibiotic efflux	Water_Enriched
Unclassified	mupA	mutation conferring antibiotic resistance	Manure_Enriched
Unclassified	OpmH	antibiotic efflux	Water_Enriched
Unclassified	TriA	antibiotic efflux	Water_Enriched
Unclassified	TriC	antibiotic efflux	Water_Enriched
Undefined	PmpM	antibiotic efflux	Manure_Enriched
Undefined	QepA4	antibiotic efflux	Water_Enriched
Undefined	tcmA	antibiotic efflux	Soil
